# Supplementary material for: Sex-Dependent Social and Repetitive Behavior and Neurochemical Profile in Mouse Model of Autism Spectrum Disorder
Source: MDPI journal article supplement (doi:10.3390/metabo12010071), 2022-01-12
Supplement: s1 [file s1]

## Article

# Sex-dependent social and repetitive behavior and neurochemical profile in mouse model of autism spectrum disorder

Helena Ferreira <sup>1,2</sup>, Ana Catarina Sousa <sup>3</sup>, José Sereno <sup>2,4</sup>, João Martins <sup>2,4</sup>, Miguel Castelo-Branco <sup>1,2,4\*</sup> and Joana Gonçalves <sup>2,4\*</sup>

<sup>1</sup> University of Coimbra, Faculty of Medicine, Portugal

<sup>2</sup> University of Coimbra, Coimbra Institute for Biomedical Imaging and Translational Research (CIBIT), Portugal

<sup>3</sup> University of Coimbra, Faculty of Sciences and Technology, Portugal

<sup>4</sup> University of Coimbra, Institute of Nuclear Sciences Applied to Health (ICNAS), Portugal

\* Correspondence: MCB: mcbranco@fmed.uc.pt; JG: jgoncalves@fmed.uc.pt; Tel.: +351 239 488510

**Supplementary Table S1.** <sup>1</sup>H-magnetic resonance spectroscopy (MRS) analysis of cortical neurochemical profile.

| Brain metabolite | Prefrontal cortex |                                  |                |                                   |
|------------------|-------------------|----------------------------------|----------------|-----------------------------------|
|                  | Male              |                                  | Female         |                                   |
|                  | WT                | <i>Tsc2</i> <sup>+/-</sup>       | WT             | <i>Tsc2</i> <sup>+/-</sup>        |
| GABA             | 2.64 ± 0.1132     | 2.60 ± 0.1167                    | 3.38 ± 0.2118  | <b>2.57 ± 0.1685<sup>#</sup></b>  |
| Glutamate        | 12.14 ± 0.3246    | 12.54 ± 0.5710                   | 10.66 ± 0.7597 | <b>13.43 ± 0.5382<sup>#</sup></b> |
| Glutamine        | 4.57 ± 0.2307     | 5.09 ± 0.4838                    | 4.27 ± 0.3094  | 4.20 ± 0.2505                     |
| Alanine          | 4.52 ± 0.0606     | <b>2.43 ± 0.1913<sup>*</sup></b> | 5.31 ± 1.4300  | <b>5.69 ± 0.6611<sup>++</sup></b> |
| Total choline    | 1.56 ± 0.0416     | <b>1.77 ± 0.0412<sup>*</sup></b> | 1.50 ± 0.0801  | <b>1.80 ± 0.0206<sup>##</sup></b> |
| NAA+NAAG         | 10.42 ± 0.1361    | 10.29 ± 0.3037                   | 10.24 ± 0.2376 | 9.91 ± 0.3070                     |
| Total creatine   | 8.97 ± 0.1569     | 9.06 ± 0.1186                    | 8.62 ± 0.2667  | 9.21 ± 0.1817                     |
| Glutathione      | 2.50 ± 0.1113     | <b>2.11 ± 0.0606<sup>*</sup></b> | 2.76 ± 0.1405  | 2.39 ± 0.1185                     |
| Inositol         | 4.71 ± 0.2387     | 4.99 ± 0.1379                    | 5.04 ± 0.4906  | <b>6.17 ± 0.2288<sup>+</sup></b>  |
| Lactate          | 3.48 ± 0.7489     | 3.22 ± 0.2109                    | 7.11 ± 1.0330  | 6.08 ± 1.0610                     |
| Taurine          | 12.26 ± 0.3411    | 11.65 ± 0.0996                   | 11.75 ± 0.7583 | <b>13.07 ± 0.4239<sup>+</sup></b> |

\* Male WT vs Male *Tsc2*<sup>+/-</sup>; <sup>#</sup> Female WT vs Female *Tsc2*<sup>+/-</sup>; <sup>+</sup> Male *Tsc2*<sup>+/-</sup> vs Female *Tsc2*<sup>+/-</sup>

**Supplementary Table S2.** <sup>1</sup>H-magnetic resonance spectroscopy (MRS) analysis of hippocampal neurochemical profile.

| Brain metabolite | Hippocampus    |                            |                         |                            |
|------------------|----------------|----------------------------|-------------------------|----------------------------|
|                  | Male           |                            | Female                  |                            |
|                  | WT             | <i>Tsc2</i> <sup>+/-</sup> | WT                      | <i>Tsc2</i> <sup>+/-</sup> |
| GABA             | 2.66 ± 0.1303  | 2.75 ± 0.1102              | 2.88 ± 0.2150           | 2.78 ± 0.1297              |
| Glutamate        | 9.91 ± 0.3096  | 10.10 ± 0.2078             | 10.14 ± 0.4660          | 9.88 ± 0.3423              |
| Glutamine        | 6.05 ± 0.6076  | 5.18 ± 0.2539              | 5.21 ± 0.2824           | 5.60 ± 0.1189              |
| Alanine          | 2.75 ± 0.0835  | 2.90 ± 0.3880              | 2.35 ± 0.1917           | 2.48 ± 0.1539              |
| Total choline    | 1.65 ± 0.0099  | <b>1.87 ± 0.0698 *</b>     | <b>1.93 ± 0.0699 \$</b> | 1.82 ± 0.0361              |
| NAA+NAAG         | 8.85 ± 0.2010  | 9.48 ± 0.1503              | 8.918 ± 0.2360          | <b>8.603 ± 0.2047 +</b>    |
| Total creatine   | 9.423 ± 0.2310 | 9.785 ± 0.1470             | 9.259 ± 0.1112          | 9.296 ± 0.0650             |
| Glutathione      | 2.25 ± 0.1109  | 2.41 ± 0.1767              | 2.20 ± 0.1426           | 2.00 ± 0.0647              |
| Inositol         | 4.77 ± 0.1217  | <b>5.67 ± 0.1246 **</b>    | 5.42 ± 0.2458           | 5.47 ± 0.1433              |
| Lactate          | 3.39 ± 0.1770  | <b>4.51 ± 0.2463 *</b>     | 3.50 ± 0.3303           | 3.57 ± 0.1376              |
| Taurine          | 10.81 ± 0.2973 | <b>11.79 ± 0.1872 *</b>    | 10.98 ± 0.2062          | <b>10.80 ± 0.1976 +</b>    |

\* Male WT vs Male *Tsc2*<sup>+/-</sup>; # Female WT vs Female *Tsc2*<sup>+/-</sup>; \$ Male WT vs Female WT;+ Male *Tsc2*<sup>+/-</sup> vs Female *Tsc2*<sup>+/-</sup>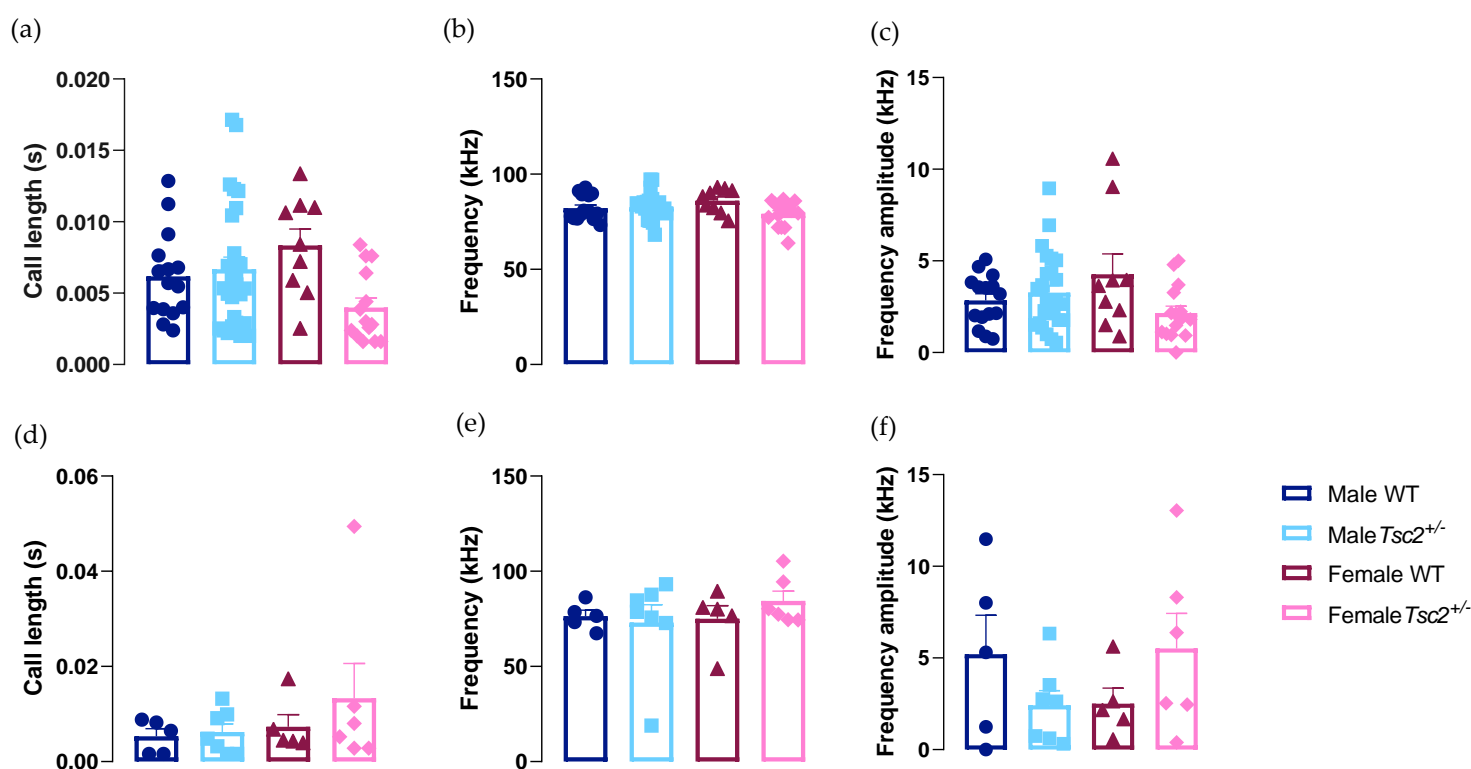**Supplementary Figure S1.** (a) Length, (b) principal frequency and (c) frequency amplitude of USVs produced during social behavior task, and (d) length, (e) principal frequency and (f) frequency amplitude of USVs produced during RRB-eliciting task.

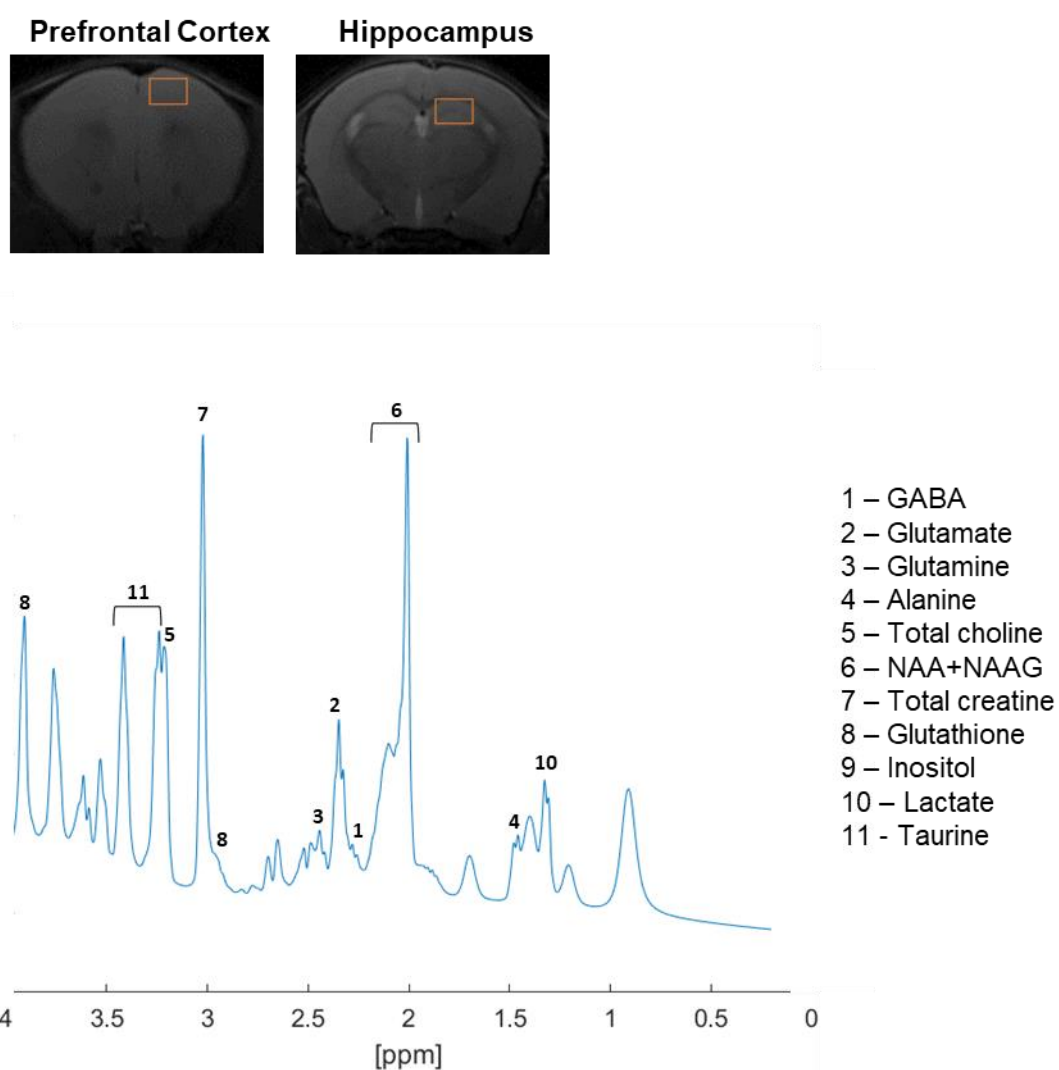

**Supplementary Figure S2.** Localized  $^1\text{H}$  NMR voxel (orange square) in the (a) prefrontal cortex and (b) hippocampus of a 60-days old mouse acquired with 9.4T MR pre-clinical scanner (Bruker Biospec, Billerica MA). Representative fast-spin-echo image of a spectrum was used to show typical location of the volume of interest for spectroscopy.
